# Supplementary material for: HOMA Index, Vitamin D Levels, Body Composition and Cardiorespiratory Fitness in Juvenile Obesity: Data from the CHILT III Programme, Cologne
Source: MDPI journal article supplement (doi:10.3390/ijerph19042442), 2022-02-20
Supplement: s1 [file s1]

Table S1: Pearson correlation coefficients between the 25(OH)D concentration and body composition, physical fitness and HOMA Index.

| Variable                         | BMI SDS                    |        | Body fat (kg)              |        | Body fat (%)               |        | Absolute cardiorespiratory fitness (W) |        | Relative cardiorespiratory fitness (W/kg) |        | Vitamin D (ng/ml)          |        | HOMA Index                 |        |
|----------------------------------|----------------------------|--------|----------------------------|--------|----------------------------|--------|----------------------------------------|--------|-------------------------------------------|--------|----------------------------|--------|----------------------------|--------|
|                                  | P-value (n)                | r      | P-value (n)                | r      | P-value (n)                | r      | P-value (n)                            | r      | P-value (n)                               | r      | P-value (n)                | r      | P-value (n)                | r      |
| Age (years)                      | .495 (n=144)               | -0.057 | <.001 <sup>†</sup> (n=137) | 0.614  | .003 <sup>†</sup> (n=137)  | 0.256  | <.001 <sup>†</sup> (n=135)             | 0.688  | .435 (n=135)                              | 0.068  | .236 (n=147)               | -0.098 | <.001 <sup>†</sup> (n=147) | 0.270  |
| Height (m)                       | .923 (n=144)               | -0.008 | <.001 <sup>†</sup> (n=137) | 0.698  | <.001 <sup>†</sup> (n=137) | 0.329  | <.001 <sup>†</sup> (n=135)             | 0.766  | .449 (n=135)                              | 0.066  | .182 (n=144)               | -0.112 | <.001 <sup>†</sup> (n=144) | 0.393  |
| Weight (kg)                      | <.001 <sup>†</sup> (n=144) | 0.540  | <.001 <sup>†</sup> (n=137) | 0.976  | <.001 <sup>†</sup> (n=137) | 0.599  | <.001 <sup>†</sup> (n=135)             | 0.579  | <.001 <sup>†</sup> (n=135)                | -0.308 | .010 <sup>†</sup> (n=144)  | -0.213 | <.001 <sup>†</sup> (n=144) | 0.459  |
| Waist circumference (cm)         | <.001 <sup>†</sup> (n=136) | 0.580  | <.001 <sup>†</sup> (n=136) | 0.830  | <.001 <sup>†</sup> (n=136) | 0.607  | .002 <sup>†</sup> (n=135)              | 0.265  | <.001 <sup>†</sup> (n=135)                | -0.453 | <.001 <sup>†</sup> (n=136) | -0.308 | <.001 <sup>†</sup> (n=136) | 0.416  |
| BMI (kg/m <sup>2</sup> )         | <.001 <sup>†</sup> (n=144) | 0.814  | <.001 <sup>†</sup> (n=137) | 0.891  | <.001 <sup>†</sup> (n=137) | 0.632  | .003 <sup>†</sup> (n=135)              | 0.257  | <.001 <sup>†</sup> (n=135)                | -0.505 | .008 <sup>†</sup> (n=144)  | -0.221 | <.001 <sup>†</sup> (n=144) | 0.359  |
| BMI SDS                          |                            |        | <.001 <sup>†</sup> (n=137) | 0.589  | <.001 <sup>†</sup> (n=137) | 0.540  | .384 (n=135)                           | -0.076 | <.001 <sup>†</sup> (n=135)                | -0.581 | .024 <sup>†</sup> (n=144)  | -0.188 | .005 <sup>†</sup> (n=144)  | 0.233  |
| Body fat (kg)                    | <.001 <sup>†</sup> (n=137) | 0.589  |                            |        | <.001 <sup>†</sup> (n=137) | 0.743  | <.001 <sup>†</sup> (n=135)             | 0.497  | <.001 <sup>†</sup> (n=135)                | -0.364 | .001 <sup>†</sup> (n=137)  | -0.270 | <.001 <sup>†</sup> (n=137) | 0.435  |
| Body fat (%)                     | <.001 <sup>†</sup> (n=137) | 0.540  | <.001 <sup>†</sup> (n=137) | 0.743  |                            |        | .099 (n=135)                           | 0.143  | <.001 <sup>†</sup> (n=135)                | -0.402 | .002 <sup>†</sup> (n=137)  | -0.266 | <.001 <sup>†</sup> (n=137) | 0.291  |
| Absolute physical fitness (W)    | .384 (n=135)               | -0.076 | <.001 <sup>†</sup> (n=135) | 0.497  | .099 (n=135)               | 0.143  |                                        |        | <.001 <sup>†</sup> (n=135)                | 0.508  | .912 (n=135)               | 0.010  | .007 <sup>†</sup> (n=135)  | 0.233  |
| Relative physical fitness (W/kg) | <.001 <sup>†</sup> (n=135) | -0.581 | <.001 <sup>†</sup> (n=135) | -0.364 | <.001 <sup>†</sup> (n=135) | -0.402 | <.001 <sup>†</sup> (n=135)             | 0.508  |                                           |        | .008 <sup>†</sup> (n=135)  | 0.227  | .111 (n=135)               | -0.138 |
| Vitamin D (ng/ml)                | .024 <sup>†</sup> (n=144)  | -0.188 | .001 <sup>†</sup> (n=137)  | -0.270 | .002 <sup>†</sup> (n=137)  | -0.266 | .912 (n=135)                           | 0.010  | .008 <sup>†</sup> (n=135)                 | 0.227  |                            |        | .003 <sup>†</sup> (n=147)  | -0.244 |
| Blood glucose (mg/dl)            | .025 <sup>†</sup> (n=144)  | -0.186 | .253 (n=137)               | 0.098  | .666 (n=137)               | 0.037  | .041 <sup>†</sup> (n=135)              | 0.176  | .565 (n=135)                              | 0.050  | .174 (n=147)               | 0.113  |                            |        |
| Insulin (μU/ml)                  | <.001 <sup>†</sup> (n=144) | 0.273  | <.001 <sup>†</sup> (n=137) | 0.434  | <.001 <sup>†</sup> (n=137) | 0.295  | .014 <sup>†</sup> (n=135)              | 0.212  | .102 (n=135)                              | -0.141 | .006 <sup>†</sup> (n=147)  | -0.226 |                            |        |
| HOMA index                       | .005 <sup>†</sup> (n=144)  | 0.233  | <.001 <sup>†</sup> (n=137) | 0.435  | <.001 <sup>†</sup> (n=137) | 0.291  | .007 <sup>†</sup> (n=135)              | 0.233  | .111 (n=135)                              | -0.138 | .003 <sup>†</sup> (n=147)  | -0.244 |                            |        |

The data are presented as the mean ± SD; BMI = body mass index; SDS = standard deviation score; HOMA = homeostasis model assessment; p-values calculated with the <sup>†</sup>Pearson-correlation
